# Supplementary material for: No Evidence of Association between Toxoplasma gondii Infection and Financial Risk Taking in Females
Source: PLoS One. 2015 Sep 24;10(9):e0136716. doi: 10.1371/journal.pone.0136716 (PMC4581702; doi:10.1371/journal.pone.0136716)
Supplement: S7 Table — Robustness analysis. (DOCX) [file pone.0136716.s012.docx]

Table 5. Regression analysis of individual parameters (Robustness analysis).

| ρ λ  Dependent Variable (1) (3) |
| --- |
| *Toxoplasma* 0.048 -0.041  (0.048) (0.262)  Age -0.0007 0.019  (0.003) (0.019).  RhD 0.052 0.140  (0.038) (0.222)  *Toxoplasma**RhD -0.060 0.023  (0.054) (0.313)  Constant 0.855*** 0.873*  (0.081) (0.466) |

R2 0.032 0.034

Observations 64 64

Notes: *Toxoplasma* is a dummy variable and equals 1 for *Toxoplasma*-infected subjects. RhD is a dummy variable and equals 1 for RhD positive subjects. Coefficients in all columns OLS regression estimates, standard errors are in parentheses; ***, **, and * indicate significance at 1%, 5%, and 10% level, respectively.
